# Supplementary material for: The Use of Non-Nutritive and Low-Calorie Sweeteners in 19,915 Local and Imported Pre-Packaged Foods in Hong Kong
Source: MDPI journal article supplement (doi:10.3390/nu13061861), 2021-05-29
Supplement: s1 [file s1]

**Supplementary Table 1.** – Prevalence [*n* (%)] of use of different non-nutritive sweeteners (NNSs) by food category<sup>1</sup>.

| Food category                          | Total <i>n</i> in category | E950      | E951      | E952     | E954     | E955      | E959    | E960     | E961    | E962    | E969    | Contains at least one NNS |
|----------------------------------------|----------------------------|-----------|-----------|----------|----------|-----------|---------|----------|---------|---------|---------|---------------------------|
| Bread and bakery products              | 1774                       | 5 (0.3)   | 1 (0.1)   | 0 (0.0)  | 5 (0.3)  | 15 (0.8)  | 0 (0.0) | 3 (0.2)  | 1 (0.1) | 0 (0.0) | 0 (0.0) | 24 (1.4)                  |
| <i>Biscuits</i>                        | 1085                       | 5 (0.5)   | 1 (0.1)   | 0 (0.0)  | 4 (0.4)  | 14 (0.3)  | 0 (0.0) | 2 (0.2)  | 1 (0.1) | 0 (0.0) | 0 (0.0) | 21 (1.9)                  |
| <i>Breads</i>                          | 181                        | 0 (0.0)   | 0 (0.0)   | 0 (0.0)  | 1 (0.6)  | 0 (0.0)   | 0 (0.0) | 0 (0.0)  | 0 (0.0) | 0 (0.0) | 0 (0.0) | 1 (0.6)                   |
| <i>Cakes and other bakery items</i>    | 508                        | 0 (0.0)   | 0 (0.0)   | 0 (0.0)  | 0 (0.0)  | 1 (0.2)   | 0 (0.0) | 1 (0.2)  | 0 (0.0) | 0 (0.0) | 0 (0.0) | 2 (0.4)                   |
| Cereal and grain products              | 2826                       | 16 (0.6)  | 1 (0.0)   | 0 (0.0)  | 0 (0.0)  | 20 (0.7)  | 0 (0.0) | 23 (0.8) | 0 (0.0) | 0 (0.0) | 1 (0.0) | 44 (1.6)                  |
| <i>Breakfast cereals</i>               | 466                        | 0 (0.0)   | 0 (0.0)   | 0 (0.0)  | 0 (0.0)  | 0 (0.0)   | 0 (0.0) | 0 (0.0)  | 0 (0.0) | 0 (0.0) | 0 (0.0) | 0 (0.0)                   |
| <i>Cereals and nut-based bars</i>      | 118                        | 0 (0.0)   | 0 (0.0)   | 0 (0.0)  | 0 (0.0)  | 0 (0.0)   | 0 (0.0) | 0 (0.0)  | 0 (0.0) | 0 (0.0) | 0 (0.0) | 0 (0.0)                   |
| <i>Noodles</i>                         | 1127                       | 16 (1.4)  | 0 (0.0)   | 0 (0.0)  | 0 (0.0)  | 20 (1.8)  | 0 (0.0) | 23 (2.0) | 0 (0.0) | 0 (0.0) | 1 (0.1) | 43 (3.8)                  |
| <i>Pasta, rice or cous cous</i>        | 655                        | 0 (0.0)   | 1 (0.2)   | 0 (0.0)  | 0 (0.0)  | 0 (0.0)   | 0 (0.0) | 0 (0.0)  | 0 (0.0) | 0 (0.0) | 0 (0.0) | 1 (0.2)                   |
| <i>Other cereal products</i>           | 460                        | 0 (0.0)   | 0 (0.0)   | 0 (0.0)  | 0 (0.0)  | 0 (0.0)   | 0 (0.0) | 0 (0.0)  | 0 (0.0) | 0 (0.0) | 0 (0.0) | 0 (0.0)                   |
| Confectionery                          | 1710                       | 145 (8.5) | 98 (5.7)  | 1 (0.1)  | 2 (0.1)  | 74 (4.3)  | 0 (0.0) | 20 (1.2) | 1 (0.1) | 1 (0.1) | 0 (0.0) | 190 (11.1)                |
| <i>Chocolates</i>                      | 735                        | 6 (0.8)   | 6 (0.8)   | 0 (0.0)  | 0 (0.0)  | 0 (0.0)   | 0 (0.0) | 10 (1.4) | 0 (0.0) | 0 (0.0) | 0 (0.0) | 16 (2.2)                  |
| <i>Sweets</i>                          | 658                        | 44 (6.7)  | 22 (3.3)  | 0 (0.0)  | 0 (0.0)  | 36 (5.5)  | 0 (0.0) | 8 (1.2)  | 0 (0.0) | 0 (0.0) | 0 (0.0) | 63 (9.6)                  |
| <i>Chewing gums</i>                    | 57                         | 43 (75.4) | 47 (82.5) | 0 (0.0)  | 0 (0.0)  | 10 (17.5) | 0 (0.0) | 0 (0.0)  | 0 (0.0) | 0 (0.0) | 0 (0.0) | 51 (89.5)                 |
| <i>Cough lollies</i>                   | 61                         | 19 (31.1) | 14 (23.0) | 0 (0.0)  | 1 (1.6)  | 6 (9.8)   | 0 (0.0) | 1 (1.6)  | 0 (0.0) | 0 (0.0) | 0 (0.0) | 23 (37.7)                 |
| <i>Jellies</i>                         | 199                        | 33 (16.6) | 9 (4.5)   | 1 (0.5)  | 1 (0.5)  | 22 (11.1) | 0 (0.0) | 1 (0.5)  | 1 (0.5) | 1 (0.5) | 0 (0.0) | 37 (18.6)                 |
| Convenience foods                      | 1171                       | 3 (0.3)   | 0 (0.0)   | 0 (0.0)  | 1 (0.1)  | 11 (0.9)  | 0 (0.0) | 9 (0.8)  | 0 (0.0) | 0 (0.0) | 0 (0.0) | 24 (2.0)                  |
| Dairy                                  | 1611                       | 23 (1.4)  | 6 (0.4)   | 1 (0.1)  | 2 (0.1)  | 24 (1.5)  | 0 (0.0) | 14 (0.9) | 0 (0.0) | 0 (0.0) | 0 (0.0) | 53 (3.3)                  |
| Edible oils and oil emulsions          | 459                        | 0 (0.0)   | 0 (0.0)   | 0 (0.0)  | 0 (0.0)  | 0 (0.0)   | 0 (0.0) | 0 (0.0)  | 0 (0.0) | 0 (0.0) | 0 (0.0) | 0 (0.0)                   |
| Eggs                                   | 74                         | 0 (0.0)   | 0 (0.0)   | 0 (0.0)  | 0 (0.0)  | 0 (0.0)   | 0 (0.0) | 0 (0.0)  | 0 (0.0) | 0 (0.0) | 0 (0.0) | 0 (0.0)                   |
| Seafood and seafood products           | 740                        | 6 (0.8)   | 0 (0.0)   | 0 (0.0)  | 0 (0.0)  | 1 (0.1)   | 0 (0.0) | 9 (1.2)  | 0 (0.0) | 0 (0.0) | 0 (0.0) | 16 (2.2)                  |
| Fruit and vegetables                   | 2525                       | 13 (0.5)  | 25 (1.0)  | 27 (1.1) | 31 (1.2) | 22 (0.9)  | 0 (0.0) | 7 (0.3)  | 4 (0.2) | 2 (0.1) | 0 (0.0) | 85 (3.4)                  |
| <i>Fruits</i>                          | 460                        | 0 (0.0)   | 13 (2.8)  | 24 (5.2) | 19 (4.1) | 9 (2.0)   | 0 (0.0) | 1 (0.2)  | 1 (0.2) | 1 (0.2) | 0 (0.0) | 35 (7.6)                  |
| <i>Herbs and spices</i>                | 586                        | 0 (0.0)   | 2 (0.3)   | 0 (0.0)  | 0 (0.0)  | 1 (0.2)   | 0 (0.0) | 1 (0.2)  | 1 (0.2) | 0 (0.0) | 0 (0.0) | 3 (0.5)                   |
| <i>Jam and marmalade</i>               | 222                        | 0 (0.0)   | 0 (0.0)   | 0 (0.0)  | 0 (0.0)  | 3 (1.4)   | 0 (0.0) | 0 (0.0)  | 0 (0.0) | 0 (0.0) | 0 (0.0) | 3 (1.4)                   |
| <i>Nuts and seeds</i>                  | 431                        | 9 (2.1)   | 8 (1.9)   | 3 (0.7)  | 2 (0.5)  | 4 (0.9)   | 0 (0.0) | 1 (0.2)  | 0 (0.0) | 0 (0.0) | 0 (0.0) | 22 (5.1)                  |
| <i>Vegetables</i>                      | 826                        | 4 (0.5)   | 2 (0.2)   | 0 (0.0)  | 10 (1.2) | 5 (0.6)   | 0 (0.0) | 4 (0.5)  | 2 (0.2) | 1 (0.1) | 0 (0.0) | 22 (2.7)                  |
| Meat and meat alternatives             | 763                        | 0 (0.0)   | 0 (0.0)   | 0 (0.0)  | 0 (0.0)  | 2 (0.3)   | 0 (0.0) | 1 (0.1)  | 0 (0.0) | 0 (0.0) | 0 (0.0) | 3 (0.4)                   |
| Non-alcoholic beverages                | 2423                       | 98 (4.0)  | 62 (2.6)  | 1 (0.0)  | 11 (0.5) | 130 (5.4) | 1 (0.0) | 42 (1.7) | 1 (0.0) | 6 (0.2) | 0 (0.0) | 241 (9.9)                 |
| <i>Coffee, tea, and beverage mixes</i> | 915                        | 27 (3.0)  | 7 (0.8)   | 0 (0.0)  | 0 (0.0)  | 8 (0.9)   | 0 (0.0) | 5 (0.5)  | 0 (0.0) | 0 (0.0) | 0 (0.0) | 34 (3.7)                  |
| <i>Cordials</i>                        | 94                         | 0 (0.0)   | 4 (4.3)   | 0 (0.0)  | 6 (6.4)  | 12 (12.8) | 0 (0.0) | 0 (0.0)  | 0 (0.0) | 0 (0.0) | 0 (0.0) | 18 (19.1)                 |
| <i>Electrolyte and energy drinks</i>   | 45                         | 8 (17.7)  | 1 (2.2)   | 0 (0.0)  | 0 (0.0)  | 16 (35.6) | 0 (0.0) | 1 (2.2)  | 0 (0.0) | 0 (0.0) | 0 (0.0) | 20 (44.4)                 |
| <i>Fruit and vegetable juices</i>      | 527                        | 2 (0.4)   | 1 (0.2)   | 0 (0.0)  | 0 (0.0)  | 9 (1.7)   | 1 (0.2) | 3 (0.6)  | 0 (0.0) | 0 (0.0) | 0 (0.0) | 15 (2.8)                  |
| <i>Soft drinks</i>                     | 672                        | 61 (9.1)  | 48 (7.1)  | 1 (0.1)  | 5 (0.7)  | 73 (10.9) | 0 (0.0) | 26 (3.9) | 1 (0.1) | 6 (0.9) | 0 (0.0) | 135 (20.1)                |
| <i>Waters</i>                          | 170                        | 0 (0.0)   | 1 (0.6)   | 0 (0.0)  | 0 (0.0)  | 12 (7.1)  | 0 (0.0) | 7 (4.1)  | 0 (0.0) | 0 (0.0) | 0 (0.0) | 19 (11.2)                 |
| Sauce, dressings, spreads and dips     | 2347                       | 6 (0.3)   | 3 (0.1)   | 0 (0.0)  | 0 (0.0)  | 27 (1.2)  | 0 (0.0) | 22 (0.9) | 0 (0.0) | 0 (0.0) | 0 (0.0) | 55 (2.3)                  |
| <i>Sauces</i>                          | 1767                       | 5 (0.3)   | 3 (0.2)   | 0 (0.0)  | 0 (0.0)  | 17 (1.0)  | 0 (0.0) | 12 (0.7) | 0 (0.0) | 0 (0.0) | 0 (0.0) | 36 (2.0)                  |
| <i>Dressings</i>                       | 333                        | 1 (0.3)   | 0 (0.0)   | 0 (0.0)  | 0 (0.0)  | 10 (3.0)  | 0 (0.0) | 9 (2.7)  | 0 (0.0) | 0 (0.0) | 0 (0.0) | 18 (5.4)                  |
| <i>Spreads and dips</i>                | 247                        | 0 (0.0)   | 0 (0.0)   | 0 (0.0)  | 0 (0.0)  | 0 (0.0)   | 0 (0.0) | 1 (0.4)  | 0 (0.0) | 0 (0.0) | 0 (0.0) | 1 (0.4)                   |

| Food category                          | Total <i>n</i> in category | E950      | E951      | E952     | E954     | E955      | E959    | E960      | E961     | E962     | E969    | Contains at least one NNS |
|----------------------------------------|----------------------------|-----------|-----------|----------|----------|-----------|---------|-----------|----------|----------|---------|---------------------------|
| Snack foods                            | 1002                       | 10 (1.0)  | 60 (6.0)  | 2 (0.2)  | 6 (0.6)  | 54 (5.4)  | 0 (0.0) | 37 (3.7)  | 5 (0.5)  | 1 (0.1)  | 0 (0.0) | 146 (14.6)                |
| <i>Potato crisps</i>                   | 312                        | 2 (0.6)   | 36 (11.5) | 0 (0.0)  | 0 (0.0)  | 18 (5.8)  | 0 (0.0) | 14 (4.5)  | 1 (0.3)  | 0 (0.0)  | 0 (0.0) | 63 (20.2)                 |
| <i>Other crisps or extruded snacks</i> | 420                        | 1 (0.2)   | 20 (4.8)  | 0 (0.0)  | 2 (0.5)  | 28 (6.7)  | 0 (0.0) | 20 (4.8)  | 3 (0.7)  | 0 (0.0)  | 0 (0.0) | 57 (13.6)                 |
| <i>Popcorn</i>                         | 32                         | 1 (3.1)   | 1 (3.1)   | 0 (0.0)  | 0 (0.0)  | 0 (0.0)   | 0 (0.0) | 0 (0.0)   | 0 (0.0)  | 0 (0.0)  | 0 (0.0) | 2 (6.3)                   |
| <i>Other snacks</i>                    | 238                        | 6 (2.5)   | 3 (1.3)   | 2 (0.8)  | 4 (1.7)  | 8 (3.4)   | 0 (0.0) | 3 (1.3)   | 1 (0.4)  | 1 (0.4)  | 0 (0.0) | 24 (10.1)                 |
| Sugars, honey and related products     | 490                        | 2 (0.4)   | 5 (1.0)   | 0 (0.0)  | 1 (0.2)  | 7 (1.4)   | 0 (0.0) | 10 (2.0)  | 0 (0.0)  | 0 (0.0)  | 0 (0.0) | 23 (4.7)                  |
| <i>Sweeteners</i>                      | 23                         | 2 (8.7)   | 5 (21.7)  | 0 (0.0)  | 1 (4.3)  | 6 (26.1)  | 0 (0.0) | 9 (39.1)  | 0 (0.0)  | 0 (0.0)  | 0 (0.0) | 21 (91.3)                 |
| <i>Sugars or honey or syrups</i>       | 467                        | 0 (0.0)   | 0 (0.0)   | 0 (0.0)  | 0 (0.0)  | 1 (0.2)   | 0 (0.0) | 1 (0.2)   | 0 (0.0)  | 0 (0.0)  | 0 (0.0) | 2 (0.4)                   |
| <i>Total</i>                           | 19915                      | 327 (1.6) | 261 (1.3) | 32 (0.2) | 59 (0.3) | 387 (1.9) | 1 (0.0) | 197 (1.0) | 12 (0.1) | 10 (0.1) | 1 (0.0) | 904 (4.5)                 |

E950: acesulfame K; E951: aspartame; E952: cyclamic acid and its sodium or calcium salts; E954: saccharin and its sodium salts; E955: sucralose; E959: neohesperidin DC; E960: stevia; E961: neotame; E962: acesulfame-aspartame salt; E969: advantame.<sup>1</sup>No product in the dataset contained E956 (alitame) or E957 (thaumatin)

**Supplementary Table 2.** – Prevalence [*n* (%)] of use of different low-calorie sweeteners (LCSs) by food category.

| Food category                          | Total n in category | E953     | E965      | E966    | E967      | E968     | E420       | E421      | Luo han guo | Contains at least one LCS |
|----------------------------------------|---------------------|----------|-----------|---------|-----------|----------|------------|-----------|-------------|---------------------------|
| Bread and bakery products              | 1774                | 9 (0.5)  | 22 (1.2)  | 0 (0.0) | 0 (0.0)   | 1 (0.1)  | 99 (5.6)   | 3 (0.2)   | 1 (0.1)     | 125 (7.0)                 |
| <i>Biscuits</i>                        | 1085                | 4 (0.4)  | 15 (1.4)  | 0 (0.0) | 0 (0.0)   | 1 (0.1)  | 25 (2.3)   | 0 (0.0)   | 0 (0.0)     | 40 (3.7)                  |
| <i>Breads</i>                          | 181                 | 0 (0.0)  | 0 (0.0)   | 0 (0.0) | 0 (0.0)   | 0 (0.0)  | 1 (0.6)    | 0 (0.0)   | 0 (0.0)     | 1 (0.6)                   |
| <i>Cakes and other bakery items</i>    | 508                 | 5 (1.0)  | 7 (1.4)   | 0 (0.0) | 0 (0.0)   | 0 (0.0)  | 73 (14.4)  | 3 (0.6)   | 1 (0.2)     | 84 (16.5)                 |
| Cereal and grain products              | 2826                | 5 (0.2)  | 9 (0.3)   | 0 (0.0) | 0 (0.0)   | 0 (0.0)  | 79 (2.8)   | 2 (0.1)   | 2 (0.1)     | 94 (3.3)                  |
| <i>Breakfast cereals</i>               | 466                 | 0 (0.0)  | 3 (0.6)   | 0 (0.0) | 0 (0.0)   | 0 (0.0)  | 0 (0.0)    | 0 (0.0)   | 2 (0.4)     | 5 (1.1)                   |
| <i>Cereals and nut-based bars</i>      | 118                 | 5 (4.2)  | 5 (4.2)   | 0 (0.0) | 0 (0.0)   | 0 (0.0)  | 6 (5.1)    | 0 (0.0)   | 0 (0.0)     | 13 (11.0)                 |
| <i>Noodles</i>                         | 1127                | 0 (0.0)  | 1 (0.1)   | 0 (0.0) | 0 (0.0)   | 0 (0.0)  | 72 (6.4)   | 2 (0.2)   | 0 (0.0)     | 75 (6.7)                  |
| <i>Pasta, rice or cous cous</i>        | 655                 | 0 (0.0)  | 0 (0.0)   | 0 (0.0) | 0 (0.0)   | 0 (0.0)  | 1 (0.2)    | 0 (0.0)   | 0 (0.0)     | 1 (0.2)                   |
| <i>Other cereal products</i>           | 460                 | 0 (0.0)  | 0 (0.0)   | 0 (0.0) | 0 (0.0)   | 0 (0.0)  | 0 (0.0)    | 0 (0.0)   | 0 (0.0)     | 0 (0.0)                   |
| Confectionery                          | 1710                | 36 (2.1) | 70 (4.1)  | 7 (0.4) | 25 (1.5)  | 11 (0.6) | 225 (13.2) | 54 (3.2)  | 1 (0.1)     | 304 (17.8)                |
| <i>Chocolates</i>                      | 735                 | 0 (0.0)  | 11 (1.5)  | 6 (0.7) | 0 (0.0)   | 0 (0.0)  | 39 (5.3)   | 0 (0.0)   | 0 (0.0)     | 56 (7.6)                  |
| <i>Sweets</i>                          | 658                 | 20 (3.0) | 5 (0.8)   | 1 (0.2) | 0 (0.0)   | 4 (0.6)  | 119 (18.1) | 14 (2.1)  | 0 (0.0)     | 151 (22.9)                |
| <i>Chewing gums</i>                    | 57                  | 6 (10.5) | 42 (73.7) | 0 (0.0) | 24 (42.1) | 2 (3.5)  | 46 (80.7)  | 39 (68.4) | 1 (1.8)     | 51 (89.5)                 |
| <i>Cough lollies</i>                   | 61                  | 7 (11.5) | 8 (13.1)  | 0 (0.0) | 1 (1.6)   | 1 (1.6)  | 8 (13.1)   | 1 (1.6)   | 0 (0.0)     | 25 (41.0)                 |
| <i>Jellies</i>                         | 199                 | 3 (1.5)  | 4 (2.0)   | 0 (0.0) | 0 (0.0)   | 4 (2.0)  | 13 (6.5)   | 0 (0.0)   | 0 (0.0)     | 21 (10.6)                 |
| Convenience foods                      | 1171                | 0 (0.0)  | 3 (0.3)   | 0 (0.0) | 0 (0.0)   | 0 (0.0)  | 36 (3.1)   | 0 (0.0)   | 0 (0.0)     | 38 (3.2)                  |
| Dairy                                  | 1611                | 0 (0.0)  | 5 (0.3)   | 0 (0.0) | 0 (0.0)   | 1 (0.1)  | 9 (0.6)    | 0 (0.0)   | 0 (0.0)     | 15 (0.9)                  |
| Edible oils and oil emulsions          | 459                 | 0 (0.0)  | 0 (0.0)   | 0 (0.0) | 0 (0.0)   | 0 (0.0)  | 1 (0.2)    | 0 (0.0)   | 0 (0.0)     | 1 (0.2)                   |
| Eggs                                   | 74                  | 0 (0.0)  | 0 (0.0)   | 0 (0.0) | 0 (0.0)   | 0 (0.0)  | 1 (1.4)    | 0 (0.0)   | 0 (0.0)     | 1 (1.4)                   |
| Seafood and seafood products           | 740                 | 0 (0.0)  | 0 (0.0)   | 0 (0.0) | 1 (0.1)   | 0 (0.0)  | 27 (3.6)   | 0 (0.0)   | 0 (0.0)     | 27 (3.6)                  |
| Fruit and vegetables                   | 2525                | 0 (0.0)  | 1 (0.0)   | 0 (0.0) | 0 (0.0)   | 0 (0.0)  | 27 (1.1)   | 1 (0.0)   | 0 (0.0)     | 28 (1.1)                  |
| <i>Fruits</i>                          | 460                 | 0 (0.0)  | 0 (0.0)   | 0 (0.0) | 0 (0.0)   | 0 (0.0)  | 0 (0.0)    | 0 (0.0)   | 0 (0.0)     | 0 (0.0)                   |
| <i>Herbs and spices</i>                | 586                 | 0 (0.0)  | 0 (0.0)   | 0 (0.0) | 0 (0.0)   | 0 (0.0)  | 5 (0.9)    | 1 (0.2)   | 0 (0.0)     | 6 (1.0)                   |
| <i>Jam and marmalade</i>               | 222                 | 0 (0.0)  | 0 (0.0)   | 0 (0.0) | 0 (0.0)   | 0 (0.0)  | 6 (2.7)    | 0 (0.0)   | 0 (0.0)     | 6 (2.7)                   |
| <i>Nuts and seeds</i>                  | 431                 | 0 (0.0)  | 0 (0.0)   | 0 (0.0) | 0 (0.0)   | 0 (0.0)  | 1 (0.2)    | 0 (0.0)   | 0 (0.0)     | 1 (0.2)                   |
| <i>Vegetables</i>                      | 826                 | 0 (0.0)  | 1 (0.1)   | 0 (0.0) | 0 (0.0)   | 0 (0.0)  | 15 (1.8)   | 0 (0.0)   | 0 (0.0)     | 15 (1.8)                  |
| Meat and meat alternatives             | 763                 | 0 (0.0)  | 0 (0.0)   | 0 (0.0) | 0 (0.0)   | 0 (0.0)  | 9 (1.2)    | 1 (0.1)   | 0 (0.0)     | 10 (1.3)                  |
| Non-alcoholic beverages                | 2423                | 1 (0.0)  | 0 (0.0)   | 0 (0.0) | 3 (0.1)   | 14 (0.6) | 3 (0.1)    | 0 (0.0)   | 3 (0.1)     | 23 (0.9)                  |
| <i>Coffee, tea and hot chocolates</i>  | 915                 | 0 (0.0)  | 0 (0.0)   | 0 (0.0) | 3 (0.3)   | 0 (0.0)  | 0 (0.0)    | 0 (0.0)   | 0 (0.0)     | 3 (0.3)                   |
| <i>Cordials</i>                        | 94                  | 0 (0.0)  | 0 (0.0)   | 0 (0.0) | 0 (0.0)   | 0 (0.0)  | 0 (0.0)    | 0 (0.0)   | 1 (1.1)     | 1 (1.1)                   |
| <i>Electrolyte and energy drinks</i>   | 45                  | 0 (0.0)  | 0 (0.0)   | 0 (0.0) | 0 (0.0)   | 2 (4.4)  | 0 (0.0)    | 0 (0.0)   | 1 (2.2)     | 2 (4.4)                   |
| <i>Fruit and vegetable juices</i>      | 527                 | 0 (0.0)  | 0 (0.0)   | 0 (0.0) | 0 (0.0)   | 0 (0.0)  | 0 (0.0)    | 0 (0.0)   | 0 (0.0)     | 0 (0.0)                   |
| <i>Soft drinks</i>                     | 672                 | 1 (0.1)  | 0 (0.0)   | 0 (0.0) | 0 (0.0)   | 9 (1.3)  | 3 (0.4)    | 0 (0.0)   | 1 (0.1)     | 14 (2.1)                  |
| <i>Waters</i>                          | 170                 | 0 (0.0)  | 0 (0.0)   | 0 (0.0) | 0 (0.0)   | 3 (1.8)  | 0 (0.0)    | 0 (0.0)   | 0 (0.0)     | 3 (1.8)                   |
| Sauce, dressings, spreads and dips     | 2347                | 0 (0.0)  | 1 (0.0)   | 0 (0.0) | 0 (0.0)   | 1 (0.0)  | 22 (0.9)   | 0 (0.0)   | 0 (0.0)     | 23 (1.0)                  |
| <i>Sauces</i>                          | 1767                | 0 (0.0)  | 0 (0.0)   | 0 (0.0) | 0 (0.0)   | 0 (0.0)  | 20 (1.1)   | 0 (0.0)   | 0 (0.0)     | 20 (1.1)                  |
| <i>Dressings</i>                       | 333                 | 0 (0.0)  | 0 (0.0)   | 0 (0.0) | 0 (0.0)   | 0 (0.0)  | 1 (0.3)    | 0 (0.0)   | 0 (0.0)     | 1 (0.3)                   |
| <i>Spreads and dips</i>                | 247                 | 0 (0.0)  | 1 (0.4)   | 0 (0.0) | 0 (0.0)   | 1 (0.4)  | 1 (0.4)    | 0 (0.0)   | 0 (0.0)     | 2 (0.8)                   |
| Snack foods                            | 1002                | 1 (0.1)  | 0 (0.0)   | 0 (0.0) | 0 (0.0)   | 0 (0.0)  | 30 (3.0)   | 0 (0.0)   | 0 (0.0)     | 31 (3.1)                  |
| <i>Potato crisps</i>                   | 312                 | 0 (0.0)  | 0 (0.0)   | 0 (0.0) | 0 (0.0)   | 0 (0.0)  | 0 (0.0)    | 0 (0.0)   | 0 (0.0)     | 0 (0.0)                   |
| <i>Other crisps or extruded snacks</i> | 420                 | 0 (0.0)  | 0 (0.0)   | 0 (0.0) | 0 (0.0)   | 0 (0.0)  | 10 (2.4)   | 0 (0.0)   | 0 (0.0)     | 10 (2.4)                  |

| Food category                      | Total n in category | E953     | E965      | E966    | E967     | E968      | E420      | E421     | Luo han guo | Contains at least one LCS |
|------------------------------------|---------------------|----------|-----------|---------|----------|-----------|-----------|----------|-------------|---------------------------|
| <i>Popcorn</i>                     | 32                  | 1 (3.1)  | 0 (0.0)   | 0 (0.0) | 0 (0.0)  | 0 (0.0)   | 1 (3.1)   | 0 (0.0)  | 0 (0.0)     | 2 (6.3)                   |
| <i>Other snacks</i>                | 238                 | 0 (0.0)  | 0 (0.0)   | 0 (0.0) | 0 (0.0)  | 0 (0.0)   | 19 (8.0)  | 0 (0.0)  | 0 (0.0)     | 19 (8.0)                  |
| Sugars, honey and related products | 490                 | 0 (0.0)  | 0 (0.0)   | 0 (0.0) | 0 (0.0)  | 10 (2.0)  | 0 (0.0)   | 0 (0.0)  | 2 (0.4)     | 10 (2.0)                  |
| <i>Sweeteners</i>                  | 23                  | 0 (0.0)  | 0 (0.0)   | 0 (0.0) | 0 (0.0)  | 10 (43.5) | 0 (0.0)   | 0 (0.0)  | 2 (8.7)     | 10 (43.5)                 |
| <i>Sugars or honey or syrups</i>   | 467                 | 0 (0.0)  | 0 (0.0)   | 0 (0.0) | 0 (0.0)  | 0 (0.0)   | 0 (0.0)   | 0 (0.0)  | 0 (0.0)     | 0 (0.0)                   |
| <b>Total</b>                       | 19915               | 52 (0.3) | 111 (0.6) | 7 (0.0) | 29 (0.1) | 38 (0.2)  | 568 (2.9) | 61 (0.3) | 9 (0.0)     | 730 (3.7)                 |

E953: isomalt; E965: maltitol; E966: lactitol; E967: xylitol; E968: erythritol; E420: sorbitol; E421: mannitol.
